# Supplementary material for: Still Excited, but Less Aroused—The Effects of Nutritional Ketosis on Epinephrine Response and Hypothalamic Orexin Neuron Activation Following Recurrent Hypoglycemia in Diabetic Rats
Source: MDPI journal article supplement (doi:10.3390/metabo13010042), 2022-12-27
Supplement: s1 [file s1]

|            |               | Blood Glucose (mmol/L) |           |           |           |           |           | Blood BHB (mmol/L) |          |          |          |          |           |
|------------|---------------|------------------------|-----------|-----------|-----------|-----------|-----------|--------------------|----------|----------|----------|----------|-----------|
|            |               | Day 1                  |           | Day 2     |           | Day 3     |           | Day 1              |          | Day 2    |          | Day 3    |           |
|            |               | 0min                   | 120min    | 0min      | 120min    | 0min      | 120min    | 0min               | 120min   | 0min     | 120min   | 0min     | 120min    |
| Non-D Chow | No Hypo (n=5) | 6.1±0.19               | 5.6±0.2   | 6.0±0.08  | 5.7±0.2   | 5.7±0.07  | 5.7±0.2   | 0.4±0.05           | 0.5±0.06 | 0.4±0.04 | 0.5±0.07 | 0.4±0.00 | 0.5±0.05  |
|            | 1x-Hypo (n=5) | 5.8±0.21               | 5.8±0.3   | 5.4±0.16  | 5.8±0.14  | 5.7±0.23  | 1.6±0.18* | 0.5±0.11           | 0.5±0.05 | 0.5±0.05 | 0.6±0.06 | 0.4±0.04 | 0.4±0.03  |
|            | 3x-Hypo (n=5) | 5.7±0.29               | 2.4±0.66* | 5.9±0.33  | 1.8±0.23* | 5.8±0.18  | 1.6±0.17* | 0.4±0.04           | 0.5±0.05 | 0.5±0.06 | 0.5±0.06 | 0.4±0.05 | 0.4±0.05  |
|            |               |                        |           |           |           |           |           |                    |          |          |          |          |           |
| Non-D Keto | No Hypo (n=5) | 4.5±0.37               | 5.0±0.28  | 5.0±0.25  | 5.3±0.17  | 5.0±0.34  | 5.1±0.22  | 3.5±0.44           | 2.5±0.34 | 2.7±0.29 | 2.1±0.19 | 2.2±0.35 | 2.3±0.54  |
|            | 1x-Hypo (n=7) | 4.2±0.10               | 4.9±0.21  | 4.3±0.33  | 5.3±0.29  | 4.9±0.36  | 1.4±0.17* | 3.3±0.26           | 2.7±0.28 | 3.8±0.63 | 2.6±0.43 | 2.7±0.42 | 0.9±0.08  |
|            | 3x-Hypo (n=5) | 4.9±0.34               | 1.5±0.20* | 4.2±0.32  | 2.1±0.38* | 4.1±0.52  | 1.9±0.16* | 2.9±0.29           | 1.1±0.2* | 4.0±0.8  | 2.8±1.02 | 4.0±0.79 | 1.5±0.15* |
|            |               |                        |           |           |           |           |           |                    |          |          |          |          |           |
| STZ-D Chow | No Hypo (n=5) | 9.1±2.26               | 6.8±2.08  | 9.1±2.98  | 7.2±1.82  | 10.3±2.36 | 7.7±2.09  | 0.4±0.02           | 0.4±0.04 | 0.4±0.03 | 0.4±0.03 | 0.4±0.05 | 0.4±0.03  |
|            | 1x-Hypo (n=5) | 12.7±3.29              | 9.7±2.76  | 13.0±2.89 | 9.2±2.09  | 11.4±3.41 | 2.6±0.31* | 0.4±0.03           | 0.4±0.07 | 0.4±0.04 | 0.4±0.02 | 0.4±0.04 | 0.4±0.05  |
|            | 3x-Hypo (n=4) | 10.7±4.93              | 2.6±0.27  | 11.9±3.01 | 2.3±0.48  | 11.8±2.25 | 2.2±0.24  | 0.4±0.05           | 0.3±0.06 | 0.3±0.03 | 0.3±0.05 | 0.3±0.04 | 0.4±0.12  |
|            |               |                        |           |           |           |           |           |                    |          |          |          |          |           |
| STZ-D Keto | No Hypo (n=5) | 10.1±2.41              | 9.8±2.36  | 10.7±2.86 | 10.3±1.91 | 11.2±1.97 | 10.8±1.85 | 3.8±1.30           | 3.9±1.53 | 4.3±1.41 | 3.3±1.09 | 3.2±1.11 | 3.6±1.43  |
|            | 1x-Hypo (n=5) | 13.4±2.98              | 12.4±2.53 | 11.9±2.61 | 12.1±2.46 | 12.6±2.54 | 2.7±0.22* | 5.0±1.08           | 5.0±1.32 | 5.6±1.08 | 5.1±1.01 | 4.2±1.07 | 0.8±0.12* |
|            | 3x-Hypo (n=5) | 12.8±4.34              | 2.9±0.68* | 9.9±2.18  | 2.1±0.19* | 10.5±2.54 | 2.2±0.13* | 5.0±1.22           | 2.4±0.74 | 4.9±1.15 | 2.0±0.79 | 5.1±0.67 | 1.4±0.22* |

**Table S1. Blood glucose (BG) and β-hydroxybutyrate (BHB) before (0min) and after (120min) insulin (or vehicle) injection.**

Data are mean ± SEM, \*p < 0.05 vs 0min.

Figure S1

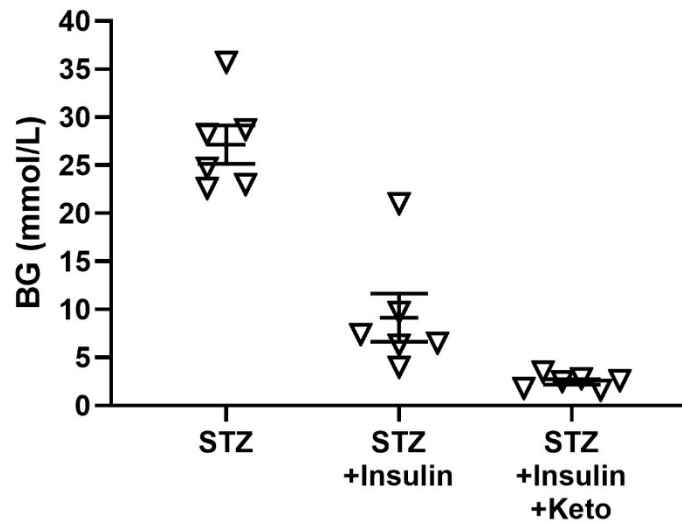

**Figure S1. Insulin supplementation in STZ-D Keto-fed rats induced profound hypoglycemia.** Following the induction of diabetes with STZ, rats ( $n = 6$ ) were implanted with 1-2 continuous-release insulin pellets which reduced hyperglycemia within 48 h (STZ+Insulin). When subjected to a keto diet, all rats in the group became hypoglycemic within the first week of feeding (STZ+Insulin+Keto). The diet was replaced with the standard chow and animals were excluded from the study.

Figure S2

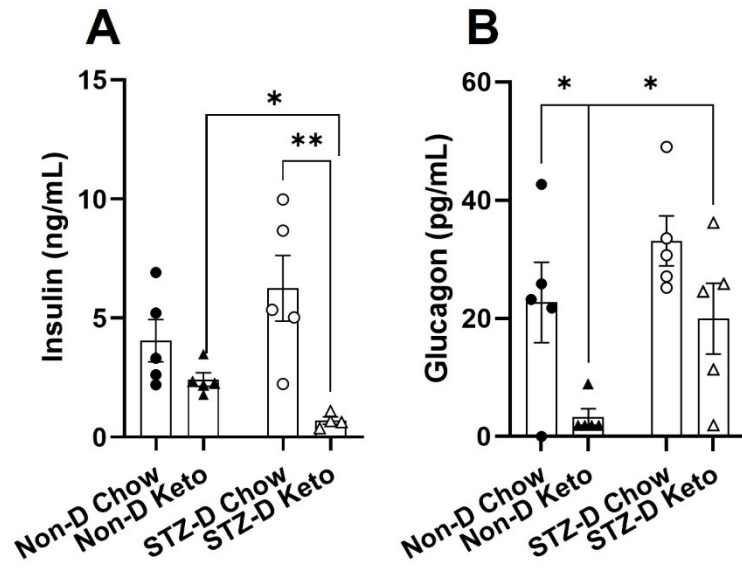

**Figure S2. Differential changes in circulating insulin and glucagon in non-diabetic and diabetic rats.** Plasma insulin and glucagon were measured in animals not subjected to hypoglycemia (No Hypo groups) to estimate the baseline levels under non-diabetic and diabetic conditions and assess the effects of diet-induced ketosis on both. A) STZ-D Keto-fed rats had significantly lower insulin than Non-D Keto-rats ( $p < 0.05$ ) and STZ-D Chow-fed rats ( $p < 0.01$ ); B) Baseline glucagon in Non-D Keto-fed rats was significantly lower than in Non-D Chow rats and STZ-D Keto rats ( $p < 0.05$ ).

Figure S3

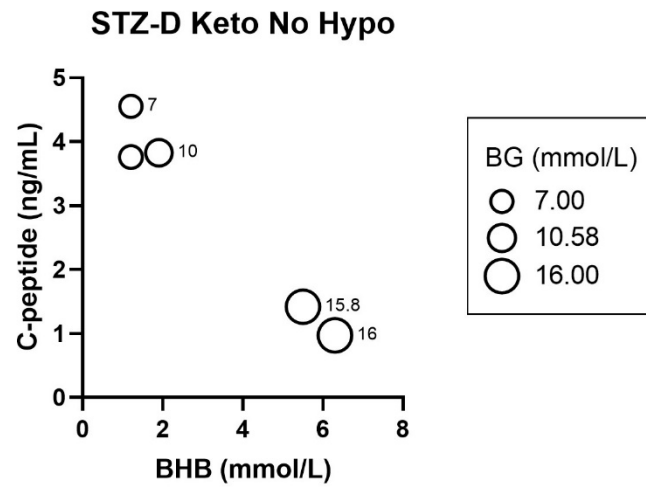

**Figure S3. C-peptide concentration inversely related to BG and BHB.** Plasma C-peptide was measured in STZ-D Keto-fed rats from the No Hypo group. Animals with highest BG and BHB had the lowest C-peptide concentration. The size of the circles indicates BG concentration and numbers show individual values.
